# Supplementary material for: Integrative modeling of tumor genomes and epigenomes for enhanced cancer diagnosis by cell-free DNA
Source: PubMed Central journal article supplement (PMC10085982; doi:10.1038/s41467-023-37768-3), 2023-04-10
Supplement: 41467_2023_37768_MOESM4_ESM.pdf [file 41467_2023_37768_MOESM4_ESM.pdf]

## **Description of Additional Supplementary Files**

File Name : Supplementary Data 1

Description : cfDNA data information

File Name : Supplementary Data 2

Description : Summary of patients and samples analyzed

File Name : Supplementary Data 3

Description : PCAWG WGS sample information

File Name : Supplementary Data 4

Description : High and low LMD regions per cancer type

File Name : Supplementary Data 5

Description : ATAC-seq sample information

File Name : Supplementary Data 6

Description : NDR peak count per sample

File Name : Supplementary Data 7

Description : Tissue-specific NDRs

File Name : Supplementary Data 8

Description : Results of cancer detection

File Name : Supplementary Data 9

Description : Results of tissue-of-origin localization

File Name : Supplementary Data 10

Description : Hyperparameter space
